# Supplementary material
Source: PubMed Central journal article supplement (PMC8327403)
Supplement: NIHMS1696860-supplement-1.pdf [file NIHMS1696860-supplement-1.pdf]

## SUPPLEMENTAL TABLES AND FIGURES

**Supplemental Figure 1.** Age distribution of 2475 person-visits. The minimum age included is 12.0 years, and the maximum is 27.5 years.

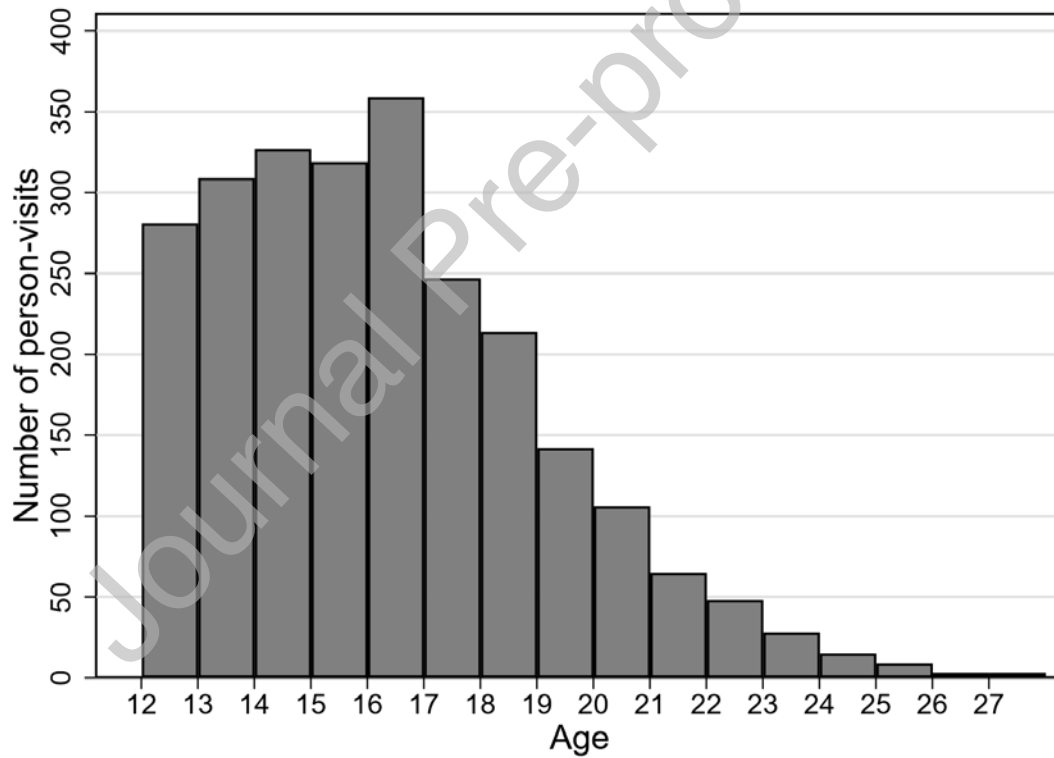

**Supplemental Figure 2.** Prevalence rates of substance use presented for each substance and frequency, stratified by age category and child sex. 95% CIs for estimates under 0.05 were not calculated. Number of contributing person-visits reported in red and blue for

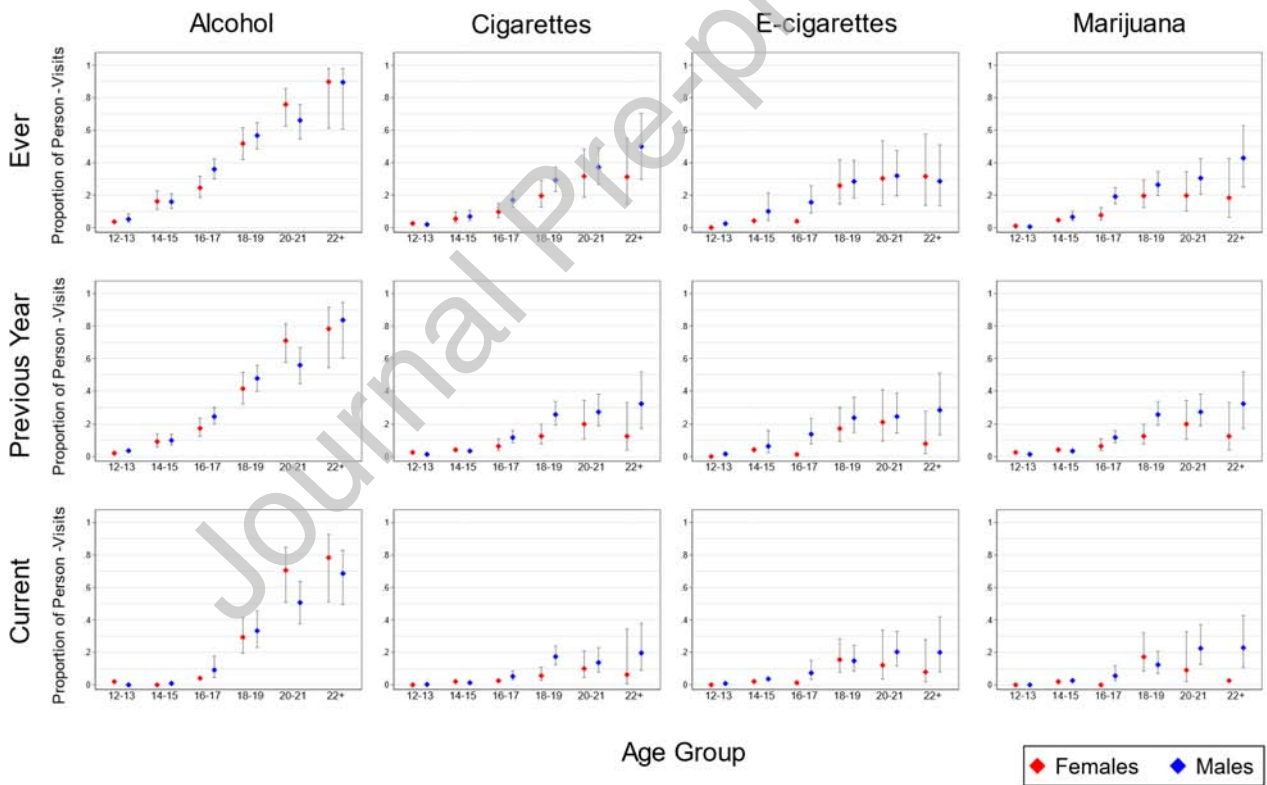

females and males, respectively.

**Supplemental Figure 3.** Change in past year use of alcohol, cigarettes, e-cigarettes and marijuana over time by age group. Those 14 to 16 are shown in black, those 17 to 18 are shown in blue, those 19 to 20 are shown in yellow and those 21 and older are shown in orange (maximum age 27.5 years). The size of the marker correspond to the number of person-visits contributing data to that point. Time-age category combinations with fewer than 20 person-visits were not included in the figure.

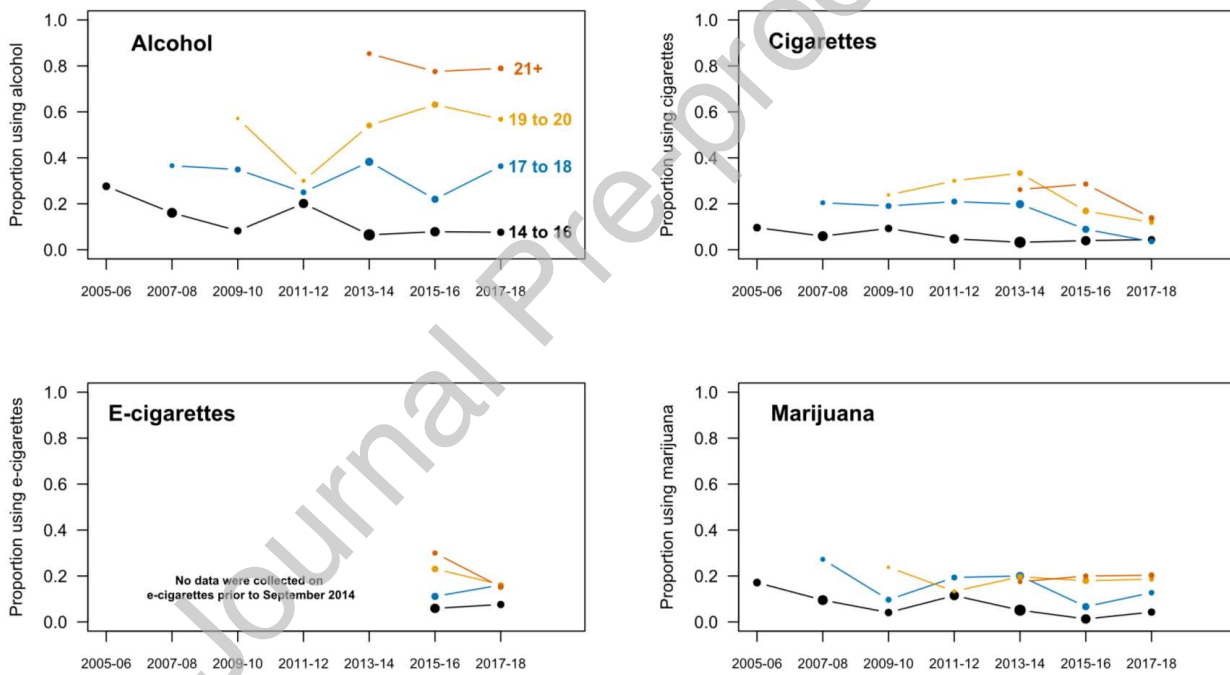

**Supplemental Figure 4.** Frequency of use stratified by substance among those who reported current use of the corresponding substance. Findings are averaged across all age groups and sex. Ages included range from 14.0 to 27.5 years.

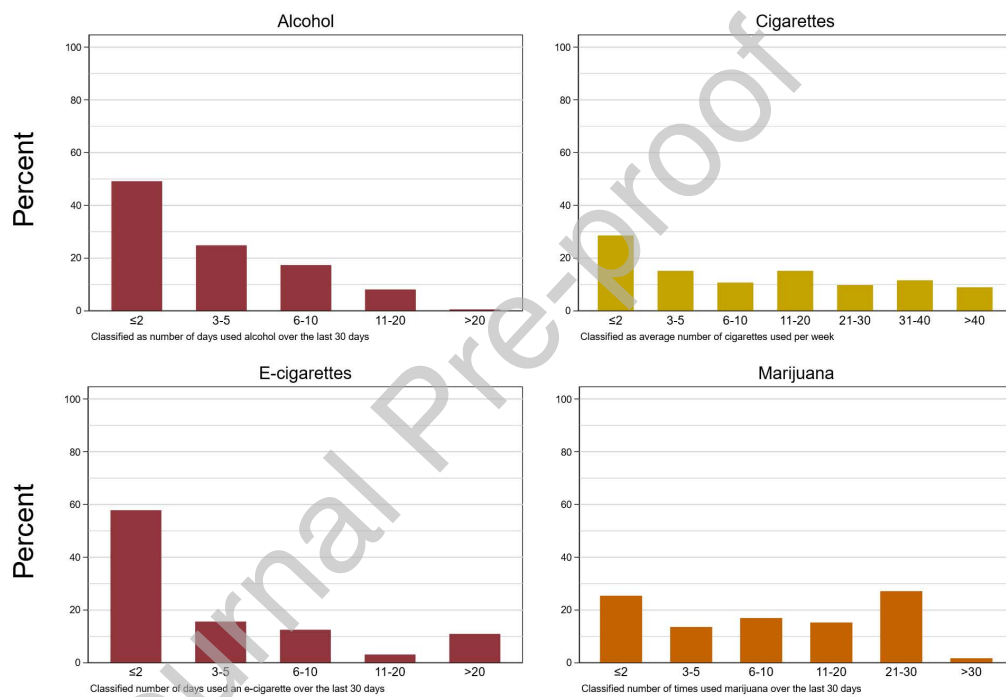

For alcohol, figure represents responses to the question “during the past 30 days, on how many days did you have at least one drink of alcohol?”. For cigarettes, figure represents responses to the question “what was the average number of cigarettes, cigars, cigarillos or little cigars you smoked per week?”. For e-cigarettes, figure represents responses to the question “during the past 30 days, on how many days did you use an electronic vapor product?”. For marijuana, figure represents responses to the question “during the past 30 days, how many times have you used marijuana?”

**Supplemental Table 1.** Bivariate and multivariate logistic regression models showing the odds ratios of current substance use as the outcome for those 14 and older. Presented as OR (95% CI). Significant findings are bolded.

| Variable                                 | Alcohol                   |                             | Cigarette                |                          | E-cigarette              |                          | Marijuana                |                          |
|------------------------------------------|---------------------------|-----------------------------|--------------------------|--------------------------|--------------------------|--------------------------|--------------------------|--------------------------|
|                                          | Bivariate <sup>b</sup>    | Multivariate <sup>c-e</sup> | Bivariate                | Multivariate             | Bivariate                | Multivariate             | Bivariate                | Multivariate             |
| Age category <sup>a</sup>                |                           |                             |                          |                          |                          |                          |                          |                          |
| 14 to <16                                | <b>0.01 (0.002, 0.10)</b> | <b>0.02 (0.002, 0.14)</b>   | <b>0.11 (0.06, 0.23)</b> | <b>0.06 (0.02, 0.16)</b> | <b>0.18 (0.07, 0.50)</b> | <b>0.14 (0.04, 0.46)</b> | <b>0.15 (0.04, 0.56)</b> | <b>0.14 (0.04, 0.51)</b> |
| 16 to <18                                | <b>0.16 (0.08, 0.34)</b>  | <b>0.23 (0.11, 0.48)</b>    | <b>0.31 (0.19, 0.50)</b> | <b>0.24 (0.13, 0.44)</b> | <b>0.29 (0.12, 0.68)</b> | <b>0.27 (0.11, 0.65)</b> | <b>0.20 (0.08, 0.51)</b> | <b>0.21 (0.08, 0.51)</b> |
| 18 to <20                                | REF                       | REF                         | REF                      | REF                      | REF                      | REF                      | REF                      | REF                      |
| 20 to <22                                | <b>2.87 (1.75, 4.71)</b>  | <b>3.64 (2.07, 6.39)</b>    | 0.99 (0.60, 1.61)        | 0.77 (0.41, 1.46)        | 1.21 (0.62, 2.36)        | 1.19 (0.53, 2.68)        | 1.34 (0.68, 2.63)        | 1.17 (0.51, 2.67)        |
| ≥22                                      | <b>6.00 (2.75, 13.09)</b> | <b>7.86 (3.10, 19.93)</b>   | 1.09 (0.48, 2.47)        | 1.08 (0.44, 2.66)        | 0.89 (0.34, 2.34)        | 0.74 (0.26, 2.12)        | 0.84 (0.32, 2.23)        | 0.69 (0.23, 2.04)        |
| Male                                     | 0.89 (0.51, 1.55)         | 1.02 (0.56, 1.88)           | <b>2.21 (1.12, 4.36)</b> | <b>3.03 (1.50, 6.15)</b> | 1.77 (0.88, 3.59)        | 1.39 (0.66, 2.92)        | 2.02 (0.87, 4.73)        | 1.99 (0.84, 4.72)        |
| Black race                               | 0.66 (0.33, 1.29)         | 0.91 (0.43, 1.91)           | <b>0.36 (0.15, 0.86)</b> | <b>0.30 (0.10, 0.90)</b> | 0.51 (0.21, 1.20)        | 0.75 (0.27, 2.09)        | 0.91 (0.34, 2.47)        | 0.89 (0.34, 2.35)        |
| Hispanic ethnicity                       | 0.41 (0.14, 1.16)         | 0.48 (0.13, 1.69)           | <b>0.32 (0.12, 0.85)</b> | <b>0.21 (0.06, 0.82)</b> | 0.56 (0.19, 1.71)        | 0.59 (0.16, 2.21)        | 0.42 (0.06, 3.13)        | 0.37 (0.05, 2.64)        |
| Maternal education:<br>less than college | 0.88 (0.46, 1.65)         | 1.41 (0.70, 2.85)           | 1.63 (0.88, 3.04)        | 1.40 (0.74, 2.64)        | 1.21 (0.59, 2.49)        | 1.45 (0.66, 3.17)        | 2.14 (0.96, 4.79)        | 2.03 (0.90, 4.59)        |
| Income                                   |                           |                             |                          |                          |                          |                          |                          |                          |
| ≤\$36k                                   | 0.54 (0.24, 1.20)         | 0.49 (0.20, 1.20)           | 0.97 (0.45, 2.08)        | 1.39 (0.61, 3.18)        | <b>0.40 (0.17, 0.96)</b> | 0.39 (0.15, 1.05)        | 0.89 (0.33, 2.41)        | 0.72 (0.28, 1.82)        |

|                   |                   |                   |                          |                          |                           |                    |                          |                   |
|-------------------|-------------------|-------------------|--------------------------|--------------------------|---------------------------|--------------------|--------------------------|-------------------|
| >\$36k to \$75k   | REF               | REF               | REF                      | REF                      | REF                       | REF                | REF                      | REF               |
| >\$75k            | 1.79 (0.90, 3.57) | 1.95 (0.93, 4.10) | 0.74 (0.36, 1.52)        | 0.73 (0.36, 1.47)        | 0.47 (0.21, 1.06)         | 0.54 (0.23, 1.23)  | 0.55 (0.21, 1.44)        | 0.44 (0.17, 1.16) |
| Glomerular        | 1.09 (0.62, 1.93) | 1.08 (0.58, 2.01) | 1.33 (0.72, 2.46)        | 1.75 (0.91, 3.35)        | 0.97 (0.49, 1.92)         | 1.35 (0.66, 2.74)  | 1.03 (0.48, 2.24)        | 1.34 (0.58, 3.06) |
| CKD Risk Category |                   |                   |                          |                          |                           |                    |                          |                   |
| A                 | REF               | REF               | REF                      | REF                      | REF                       | REF                | REF                      | REF               |
| B to C            | 0.66 (0.36, 1.22) | 0.93 (0.50, 1.74) | 1.49 (0.80, 2.80)        | 1.79 (0.90, 3.53)        | 1.58 (0.74, 3.37)         | 1.98 (0.85, 4.60)  | 0.93 (0.37, 2.32)        | 1.04 (0.42, 2.61) |
| D to E            | 0.60 (0.26, 1.38) | 0.66 (0.25, 1.75) | <b>2.33 (1.09, 4.96)</b> | 2.18 (0.93, 5.11)        | 1.57 (0.61, 4.01)         | 1.96 (0.70, 5.50)  | 0.92 (0.30, 2.82)        | 1.08 (0.35, 3.30) |
| F to ESKD         | 0.62 (0.23, 1.73) | 0.84 (0.30, 2.39) | <b>3.84 (1.78, 8.30)</b> | <b>2.83 (1.19, 6.73)</b> | <b>4.03 (1.30, 12.48)</b> | 2.90 (0.78, 10.71) | <b>3.17 (1.10, 9.13)</b> | 1.94 (0.64, 5.88) |
| Uncontrolled BP   | 1.06 (0.65, 1.73) | 1.17 (0.66, 2.07) | <b>1.78 (1.14, 2.76)</b> | 1.04 (0.63, 1.71)        | 1.51 (0.86, 2.66)         | 1.25 (0.61, 2.54)  | <b>2.33 (1.26, 4.29)</b> | 1.89 (0.95, 3.77) |
| Anemia            | 0.94 (0.56, 1.57) | 1.43 (0.79, 2.57) | 0.99 (0.58, 1.70)        | 0.53 (0.28, 1.01)        | 1.40 (0.76, 2.57)         | 0.95 (0.40, 2.24)  | 1.58 (0.79, 3.17)        | 1.39 (0.56, 3.47) |

<sup>a</sup>Bivariate models for age category (14 or older) were univariate, with no other variables besides age included in model

<sup>b</sup>Bivariate models, with the exception of age category models, included the variable at hand as well as age category (14 or older)

<sup>c</sup>Odds ratios obtained for multivariate estimates for all variables besides uncontrolled BP and anemia adjusted for the following covariates: age category (14 or older), sex, race (Black vs. non-Black), Hispanic ethnicity, maternal education, income, glomerular disease, and risk category (Model 1)

<sup>d</sup>Odds ratios obtained for multivariate estimates for uncontrolled BP used Model 1 + uncontrolled BP

<sup>e</sup>Odds ratios obtained for multivariate estimates for anemia used Model 1 + anemia
